# Supplementary material for: Development and Application of an Automated Raman Sensor for Bioprocess Monitoring: From the Laboratory to an Algae Production Platform
Source: MDPI journal article supplement (doi:10.3390/s23249746), 2023-12-11
Supplement: s1 [file s1]

## Supplementary Materials

**Table S1.** Overview of the main Raman bands observed during the analysis of *Parachlorella Kessleri*. Abbreviations indicate:  $\nu$ , stretching;  $\delta$ , bending;  $\rho$ , rocking s, symmetrical; as, asymmetrical.

| RAMAN SHIFT (cm <sup>-1</sup> ) | ASSIGNMENT OF BANDS                               | MOLECULES OF INTEREST                |
|---------------------------------|---------------------------------------------------|--------------------------------------|
| 479                             | $\delta$ (C-C-C)                                  | Carbohydrates                        |
| 744                             | $\nu$ (H-C-O) / $\delta$ (N-C-C)                  | Carbohydrates / chlorophyll <i>a</i> |
| 865                             | C <sub>4</sub> N <sup>+</sup> , $\nu_s$ (O-C-C-N) | Phospholipids                        |
| 915                             | $\delta$ (N-C-C), $\delta$ (C-C-C)                | Chlorophyll <i>a</i>                 |
| 988                             | $\delta$ (C-H <sub>3</sub> )                      | Chlorophyll <i>a</i>                 |
| 997                             | $\nu$ (C-C)                                       | Beta-carotene                        |
| 1009                            | $\rho$ (C-C)                                      | Carotenoids                          |
| 1157                            | $\nu$ (C-C)                                       | Carotenoids                          |
| 1191                            | $\delta$ (C-H)                                    | Beta-carotene                        |
| 1444                            | $\delta$ (C-H <sub>2</sub> )                      | Lipids                               |
| 1524                            | $\nu$ (C=C)                                       | Carotenoids                          |
| 1600–1700                       | Amide I                                           | Proteins                             |
| 1660                            | $\nu$ (C=C) <sub>cis</sub>                        | Lipids                               |
| 1750                            | $\nu$ (C=O)                                       | Lipids                               |
| 2850                            | $\nu_s$ (C-H <sub>2</sub> )                       | Lipids                               |
| 2885                            | $\nu_s$ (C-H <sub>3</sub> )                       | Lipids                               |
| 2940                            | $\nu_{as}$ (C-H <sub>2</sub> )                    | Lipids                               |
| 2970                            | $\nu_{as}$ (C-H <sub>3</sub> )                    | Lipids                               |
| 3008                            | $\nu_{as}$ (=C-H)                                 | Lipids                               |

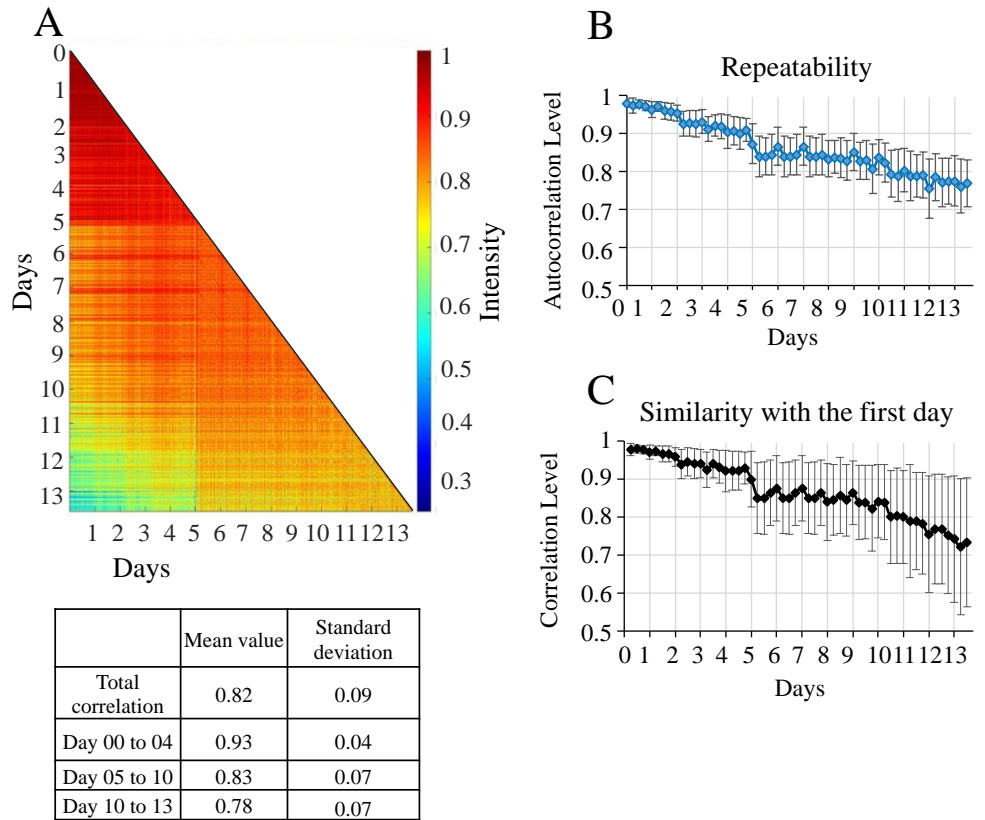

**Figure S1.** A. 2D correlation map of all spectra, with a correlation table covering the 14 days of culture in a 100-L tubular airlift bioreactor. The colour of each map point represents the level of correlation between two spectra, from red (highest correlation) to blue (lowest correlation). B. Repeatability of spectra measured by the autocorrelation level between 50 spectra recorded in the same time window. C. Evolution of the correlation level of the spectra compared by correlation with the first day

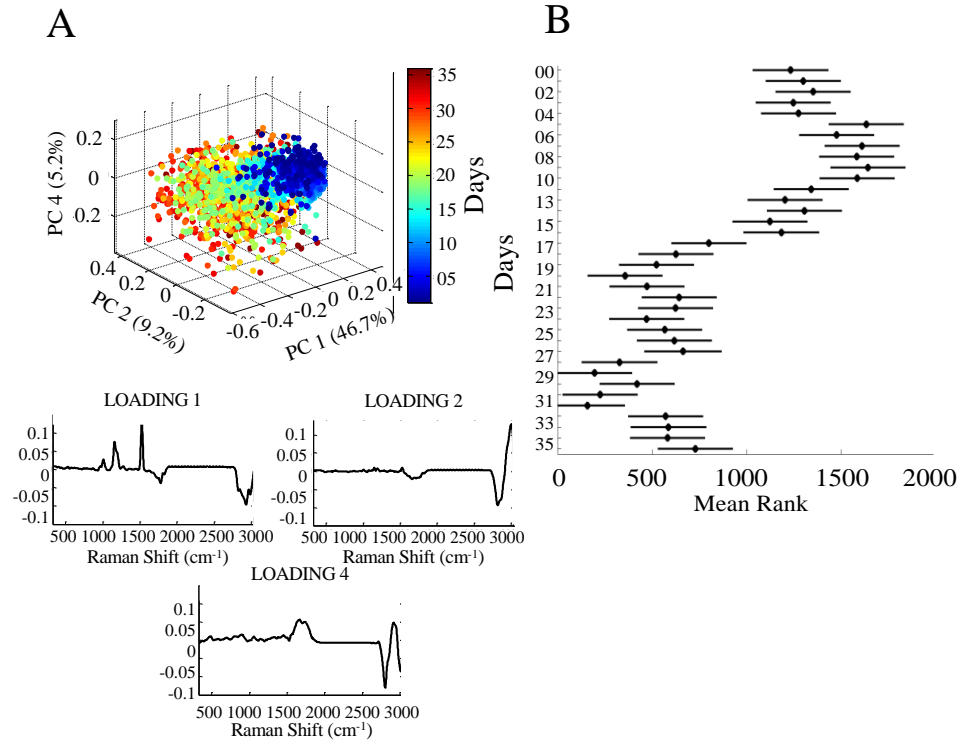

**Figure S2.** Three-dimensional representation of the principal component analysis (PCA) of 36 days of culture in a 1-L laboratory-scale photobioreactor (PC1 46.7%; PC2 9.2%; PC4 5.2%) and their three respective loadings. B. Kruskal-Wallis one-way ANOVA test, based on PCA loading 1, representing the variance of the spectra over the 36 days in a 1-L laboratory-scale culture.

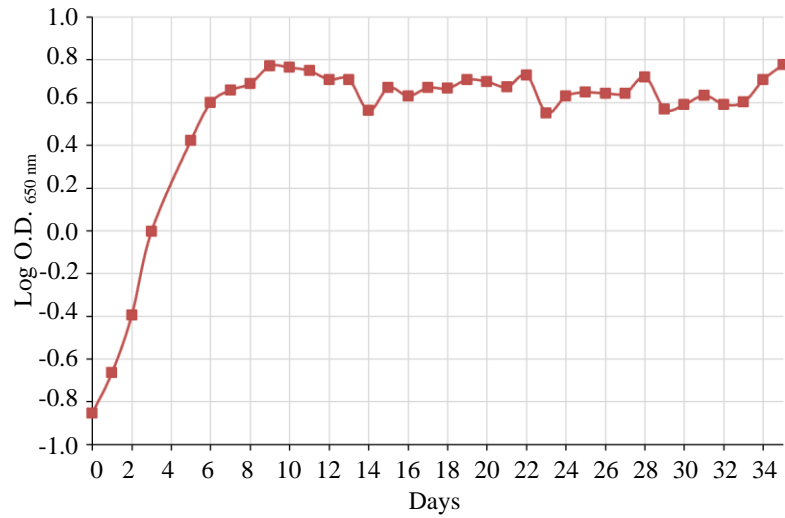

**Figure S3.** Monitoring of *Parachlorella kessleri* in Bold Basal Medium in a 1-L tubular airlift photobioreactor from day 0 to day 35. Cell density increase during cell growth until nitrogen limitation (tenth day), stabilizing afterwards.

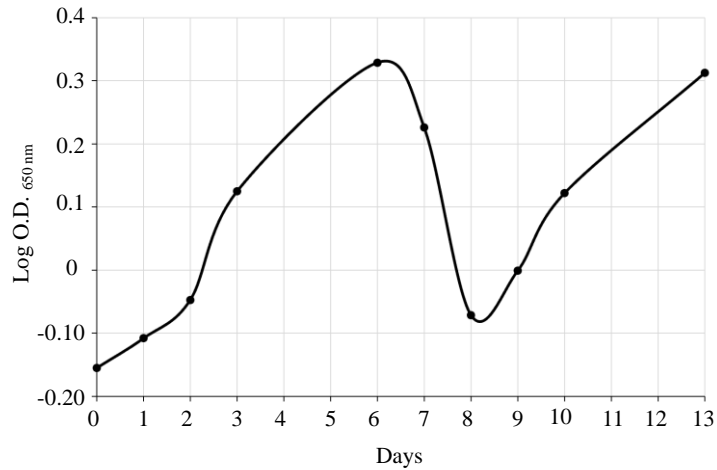

**Figure S4.** Monitoring of *Parachlorella kessleri* in Bold Basal Medium in a 100-L tubular airlift photobioreactor from day 0 to day 13. Cell density increase during cell growth until 6<sup>th</sup> when another 50L of BBM medium was added, the cell density increased again after the 8<sup>th</sup> day
